# Supplementary material for: Non-invasive hemoglobin measurement devices require refinement to match diagnostic performance with their high level of usability and acceptability
Source: PubMed Central journal article supplement (PMC8284642; doi:10.1371/journal.pone.0254629), 2021-07-16
Supplement: pone.0254629.s005.pdf [file pone.0254629.s005.pdf]

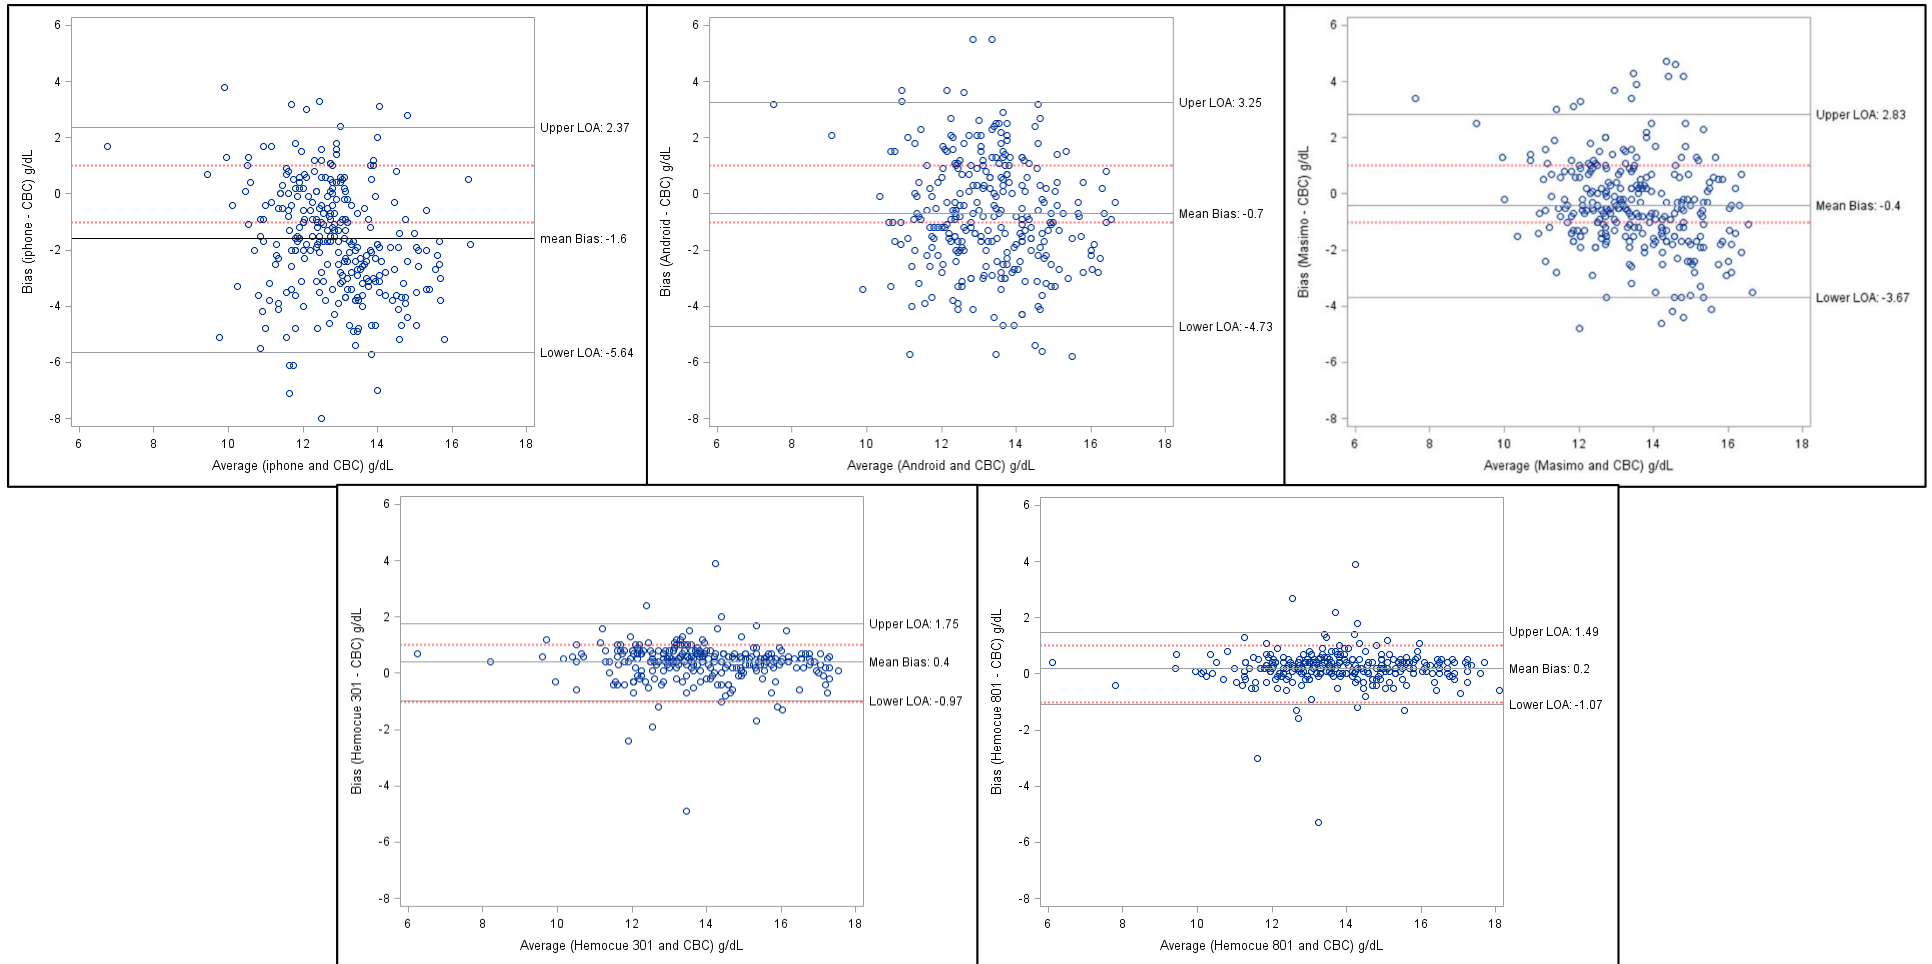

**S4 Fig.** Bland Altman plots illustrating the bias (difference) between the test devices (A=Apple®; B=Android®; C=Masimo Pronto®; D=HemoCue® Hb-301; E=HemoCue® Hb-801) and reference Hgb readings, plotted against the average of the test device and reference Hgb concentrations.
